# Supplementary material for: Relationship between Brain Tissue Changes and Blood Biomarkers of Cyclophilin A, Heme Oxygenase-1, and Inositol-Requiring Enzyme 1 in Patients with Alzheimer’s Disease
Source: MDPI journal article supplement (doi:10.3390/diagnostics11050740), 2021-04-21
Supplement: s1 [file s1]

# Supplementary Figures and Tables

**Supplementary Table S1.** Locations of the voxel-based multiple regression analyses between gray matter volume (GMV) and the three blood-based biomarkers in all participants.

| Group Analysis | Cluster Size | Cluster Location              | BA | Talairach Coordinates | Z Score | ROI      |
|----------------|--------------|-------------------------------|----|-----------------------|---------|----------|
| Positive CypA  |              |                               |    |                       |         |          |
|                | 560          | Rt middle occipital gyrus     | 19 | 31.99, -80.98, 5.25   | 4.263   | Cluster1 |
|                |              | Rt lingual gyrus              | 18 | 32.18, -71.29, -7.34  | 3.844   |          |
|                | 227          | Rt middle temporal gyrus      | 21 | 55.95, -18.05, -4.59  | 4.007   |          |
|                |              | Rt superior temporal gyrus    | 22 | 49.06, -21.81, -9.12  | 3.919   |          |
|                | 162          | Rt middle temporal gyrus      | 22 | 48.79, -42.94, 5.09   | 3.736   |          |
|                | 213          | Rt cerebellum, declive        |    | 15.65, -71.68, -17.11 | 3.705   |          |
|                | 112          | Rt cerebellum, culmen         |    | 24.03, -49.37, -14.86 | 3.664   |          |
|                |              | Rt temporal fusiform gyrus    | 37 | 32.39, -43.69, -15.53 | 3.456   |          |
| Negative CypA  |              |                               |    |                       |         |          |
|                | 116          | Lt limbic posterior cingulate | 23 | -2.72, -27.34, 20.56  | 3.903   |          |
| Positive HO-1  |              |                               |    |                       |         |          |
|                | 163          | Lt parietal postcentral gyrus | 7  | -18.67, -48.74, 66.91 | 4.004   | Cluster2 |
|                | 154          | Lt limbic lobe uncus          | 28 | -31.17, 2.66, -25.73  | 3.996   |          |
| Negative IRE1  |              |                               |    |                       |         |          |
|                | 176          | Lt lateral globus pallidus    |    | -20.37, -14.73, -6.92 | 3.933   | Cluster3 |
|                |              | Lt Putamen                    |    | -24.54, -5.18, -3.39  | 3.479   |          |
|                | 101          | Rt limbic lobe uncus          | 28 | 14.69, 6.88, -27.25   | 3.878   |          |
|                | 112          | Rt hypothalamus               |    | 7.52, -1.64, -11.97   | 3.837   |          |

We adjusted subject's total intracranial volume (TIV), gender, age and education-year as covariates. A significance level of  $p = 0.0005$  was applied without correction for multiple comparisons with the minimum cluster size at least 100 contiguous voxels. ROI, region-of-interest; Rt, right; Lt, left; BA, Brodmann area; CypA, cyclophilin A; HO-1, heme oxygenase-1; IRE1, inositol-requiring enzyme 1.

**Supplementary Table S2.** Locations of the voxel-based multiple regression analyses between white matter volume (WMV) and the three blood-based biomarkers in all subjects.

| Group Analysis | Cluster Size | Cluster Location            | BA | Talairach Coordinates | Z Score | ROI      |
|----------------|--------------|-----------------------------|----|-----------------------|---------|----------|
| Positive CypA  |              |                             |    |                       |         |          |
|                | 104          | Rt inferior parietal lobule |    | 46.95, -38.08, 42     | 4.325   | Cluster4 |
|                | 247          | Rt middle temporal gyrus    |    | 53.32, -11.53, -13.48 | 4.325   |          |
| Negative IRE1  |              |                             |    |                       |         |          |
|                | 237          | Lt parietal lobe precuneus  | 31 | -8.51, -72.95, 25.6   | 4.274   | Cluster5 |
|                |              | Lt occipital lobe cuneus    | 18 | -1.61, -76.04, 28.13  | 3.809   |          |
|                |              | Rt occipital lobe cuneus    | 19 | 6.66, -76.47, 32.28   | 3.697   |          |
|                | 172          | Rt superior parietal lobule | 7  | 28.82, -50.95, 44.53  | 3.848   |          |

We adjusted subject's total intracranial volume (TIV), age and education-year as covariates. A significance level of  $p = 0.0005$  was applied without correction for multiple comparisons with the minimum cluster size at least 100 contiguous voxels. ROI, region-of-interest; Rt, right; Lt, left; BA, Brodmann area; CypA, cyclophilin A; HO-1, heme oxygenase-1; IRE1, inositol-requiring enzyme 1.

The cluster ROIs are listed in the Supplementary Table 1 and 2: Cluster 1 is the area of the right middle occipital gyrus and lingual gyrus, Cluster 2 is the area of the left uncus in the limbic lobe, Cluster 3 is the area of the left lateral globus pallidus and putamen, Cluster 4 is the area of the right middle temporal gyrus, and Cluster 5 is the area of the left and right cuneus in the occipital lobe and left precuneus in the parietal lobe. Other graphs are shown in the Supplementary Figure 1.

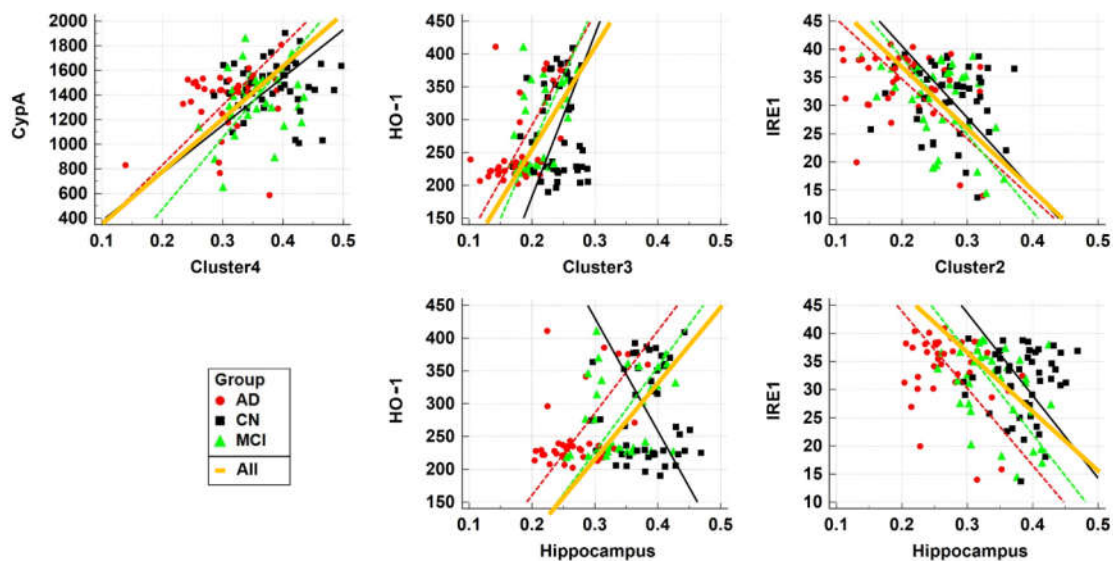

**Supplementary Figure S1.**
